# Supplementary material for: Plasma Metabolomic and Lipidomic Profiling of Metabolic Dysfunction-Associated Fatty Liver Disease in Humans Using an Untargeted Multiplatform Approach
Source: Metabolites. 2022 Nov 8;12(11):1081. doi: 10.3390/metabo12111081 (PMC9693407; doi:10.3390/metabo12111081)
Supplement: Supplementary file 1 [file metabolites-12-01081-s001.zip › Supplementary sheets_MAFLD_11062022.xlsx]

## Sheet:  Lipidomics
MWAS selected first 10 lipidomics features
Analysis	Code	polarity	mz_time	m/z	Retention time (s)	Annotation	delta (ppm)	ID level	Formula	Monoisotopic Mass	Adduct	HMDB_ID
Lipidomics	NA	positive	313.274__522.79	313.274	522.79	Unknown	NA	NA	NA	NA	NA	NA
Lipidomics	NA	positive	365.1941__68.59	365.194	68.59	12-Oxo-20-carboxy-leukotriene B4	4.82	3	C20H28O6	364.189	M+H	HMDB12550
Lipidomics	NA	positive	589.4807__475.48	589.481	475.48	DG(14:020:4(5Z8Z11Z14Z)0:0)	3.31	3	C37H64O5	588.475	M+H	HMDB07025
Lipidomics	NA	positive	596.5334__522.29	596.533	522.29	Unknown	NA	NA	NA	NA	NA	NA
Lipidomics	NA	positive	603.4951__499.93	603.495	499.93	DG(15:020:4(5Z8Z11Z14Z)0:0)	5.3	3	C38H66O5	602.491	M+H	HMDB07083
Lipidomics	NA	positive	614.5629__522.55	614.563	522.55	Unknown	NA	NA	NA	NA	NA	NA
Lipidomics	NA	positive	642.516__491.96	642.516	491.96	Unknown	NA	NA	NA	NA	NA	NA
Lipidomics	NA	positive	656.6292__615.48	656.629	615.48	CE(17:0)	7.31	5	C44H78O2	638.6	M+NH4	HMDB60059
Lipidomics	NA	positive	741.6762__678.75	741.676	678.75	TG(14:014:018:1(11Z))	0.69	5	C49H92O6	776.689	M+H-2H2O	HMDB42070
Lipidomics	NA	positive	816.6538__708.81	816.654	708.81	PC(14:024:1(15Z))	7.49	3	C46H90NO8P	815.64	M+H	HMDB07894
DIABLO selected 8 lipidomics features
Analysis	Code	polarity	mz_time	m/z	Retention time (s)	Annotation	delta (ppm)	ID level	Formula	Monoisotopic Mass	Adduct	HMDB_ID
Lipidomics	lip157	positive	546.0205__1158.15	546.02	1158.15	Methylgallic acid-O-sulphate	2	5	C19H17N5O7S3	523.029	2M+NH4	HMDB0060005
Lipidomics	lip327	positive	695.5726__711.53	695.573	711.53	CE(18:1(9Z))	1.81	5	C45H78O2	650.6	M+2Na-H	HMDB00918
Lipidomics	lip331	positive	696.5763__711.38	696.576	711.38	Glyceryl palmitostearate	2.05	5	C37H76O7	632.559	M+ACN+Na	HMDB32300
Lipidomics	lip334	positive	697.5795__711.53	697.58	711.53	DG(20:0/22:6(4Z,7Z,10Z,13Z,16Z,19Z)/0:0)	4.23	3	C45H76O5	696.569	M+H	HMDB0007382
Lipidomics	lip335	positive	698.592__734.32	698.592	734.32	Plastoquinone 8	7.09	5	C48H72O2	680.553	M+NH4	HMDB30129
Lipidomics	lip778	negative	855.658__491.85	855.658	491.85	SM(d18:0/22:0)	1	5	C45H93N2O6P	788.677	M-H+HCOONa	HMDB0012091
Lipidomics	lip781	negative	867.6586__450.4	867.659	450.4	SM(d17:1/24:0)	1	3	C46H93N2O6P	800.677	M-H+HCOONa	HMDB0011695
Lipidomics	lip782	negative	868.6603__451.26	868.66	451.26	Unknown	NA	NA	NA	NA	NA	NA
NA: not applicable
ID level indicates degree of annotation as defined by Schymanski et al. Schymanski EL, Jeon J, Gulde R, Fenner K, Ruff M, Singer HP, Hollender J. Identifying small molecules via high resolution mass spectrometry: communicating confidence. Environmental science & technology. 2014;48(4):2097–8.

## Sheet: Metabolomics
MWAS selected first 9 Metabolomics features
Analysis	Code	polarity	mz_time	m/z	Retention time (s)	chemical_ID	Annotation.confidence.score	Annotation.raw.score	Module_RTclust	mz	time	MatchCategory	theoretical.mz	delta_ppm	Name	Formula	MonoisotopicMass	Adduct
Metabolomics	NA	positive	168.0736__201.27	168.074	201.27	HMDB00375	3	2.59975e+08	50_1_14	168.074	201.3	Multiple	NA	NA	3-(3-Hydroxyphenyl)propanoic acid	C9H10O3	-	M+H_[+1]
Metabolomics	NA	positive	168.0736__201.27	168.074	201.27	HMDB00563	3	2.59975e+08	50_1_14	168.074	201.3	Multiple	NA	NA	D-Phenyllactic acid	C9H10O3	-	M+H_[+1]
Metabolomics	NA	positive	168.0736__201.27	168.074	201.27	HMDB00748	3	2.59975e+08	50_1_14	168.074	201.3	Multiple	NA	NA	L-3-Phenyllactic acid	C9H10O3	-	M+H_[+1]
Metabolomics	NA	positive	168.0736__201.27	168.074	201.27	HMDB00779	3	2.59975e+08	50_1_14	168.074	201.3	Multiple	NA	NA	Phenyllactic acid	C9H10O3	-	M+H_[+1]
Metabolomics	NA	positive	168.0736__201.27	168.074	201.27	HMDB02072	3	2.59975e+08	50_1_14	168.074	201.3	Multiple	NA	NA	4-Methoxyphenylacetic acid	C9H10O3	-	M+H_[+1]
Metabolomics	NA	positive	168.0736__201.27	168.074	201.27	HMDB02199	3	2.59975e+08	50_1_14	168.074	201.3	Multiple	NA	NA	Desaminotyrosine	C9H10O3	-	M+H_[+1]
Metabolomics	NA	positive	168.0736__201.27	168.074	201.27	HMDB02229	3	2.59975e+08	50_1_14	168.074	201.3	Multiple	NA	NA	3-Phenoxypropionic acid	C9H10O3	-	M+H_[+1]
Metabolomics	NA	positive	168.0736__201.27	168.074	201.27	HMDB05175	3	2.59975e+08	50_1_14	168.074	201.3	Multiple	NA	NA	Homovanillin	C9H10O3	-	M+H_[+1]
Metabolomics	NA	positive	168.0736__201.27	168.074	201.27	HMDB29665	3	2.59975e+08	50_1_14	168.074	201.3	Multiple	NA	NA	Ethyl vanillin	C9H10O3	-	M+H_[+1]
Metabolomics	NA	positive	168.0736__201.27	168.074	201.27	HMDB29817	3	2.59975e+08	50_1_14	168.074	201.3	Multiple	NA	NA	Ethyl salicylate	C9H10O3	-	M+H_[+1]
Metabolomics	NA	positive	168.0736__201.27	168.074	201.27	HMDB31132	3	2.59975e+08	50_1_14	168.074	201.3	Multiple	NA	NA	34-Dihydroxyphenylacetone	C9H10O3	-	M+H_[+1]
Metabolomics	NA	positive	168.0736__201.27	168.074	201.27	HMDB32030	3	2.59975e+08	50_1_14	168.074	201.3	Multiple	NA	NA	Guaicyl acetate	C9H10O3	-	M+H_[+1]
Metabolomics	NA	positive	168.0736__201.27	168.074	201.27	HMDB32138	3	2.59975e+08	50_1_14	168.074	201.3	Multiple	NA	NA	34-Dimethoxybenzaldehyde	C9H10O3	-	M+H_[+1]
Metabolomics	NA	positive	168.0736__201.27	168.074	201.27	HMDB32573	3	2.59975e+08	50_1_14	168.074	201.3	Multiple	NA	NA	Ethylparaben	C9H10O3	-	M+H_[+1]
Metabolomics	NA	positive	168.0736__201.27	168.074	201.27	HMDB32605	3	2.59975e+08	50_1_14	168.074	201.3	Multiple	NA	NA	Methyl 2-methoxybenzoate	C9H10O3	-	M+H_[+1]
Metabolomics	NA	positive	168.0736__201.27	168.074	201.27	HMDB32639	3	2.59975e+08	50_1_14	168.074	201.3	Multiple	NA	NA	Methyl 4-methoxybenzoate	C9H10O3	-	M+H_[+1]
Metabolomics	NA	positive	168.0736__201.27	168.074	201.27	HMDB33752	3	2.59975e+08	50_1_14	168.074	201.3	Multiple	NA	NA	3-(2-Hydroxyphenyl)propanoic acid	C9H10O3	-	M+H_[+1]
Metabolomics	NA	positive	168.0736__201.27	168.074	201.27	HMDB34243	3	2.59975e+08	50_1_14	168.074	201.3	Multiple	NA	NA	Ipomeanine	C9H10O3	-	M+H_[+1]
Metabolomics	NA	positive	168.0736__201.27	168.074	201.27	HMDB34993	3	2.59975e+08	50_1_14	168.074	201.3	Multiple	NA	NA	4-Methoxybenzyl formate	C9H10O3	-	M+H_[+1]
Metabolomics	NA	positive	168.0736__201.27	168.074	201.27	HMDB40645	3	2.59975e+08	50_1_14	168.074	201.3	Multiple	NA	NA	3-Hydroxy-1-(4-hydroxyphenyl)-1-propanone	C9H10O3	-	M+H_[+1]
Metabolomics	NA	positive	168.0736__201.27	168.074	201.27	HMDB41611	3	2.59975e+08	50_1_14	168.074	201.3	Multiple	NA	NA	Ethyl 2-furanacrylate	C9H10O3	-	M+H_[+1]
Metabolomics	NA	positive	168.0736__201.27	168.074	201.27	HMDB41683	3	2.59975e+08	50_1_14	168.074	201.3	Multiple	NA	NA	4-Hydroxyphenyl-2-propionic acid	C9H10O3	-	M+H_[+1]
Metabolomics	NA	positive	168.0736__201.27	168.074	201.27	HMDB59969	3	2.59975e+08	50_1_14	168.074	201.3	Multiple	NA	NA	3-Methoxyphenylacetic acid	C9H10O3	-	M+H_[+1]
Metabolomics	NA	positive	192.124__609.65	192.124	609.65	HMDB14494	0	0	50_51_1	192.124	609.6	Multiple	192.125	5	Minoxidil	C9H15N5O	209.128	M+H-H2O
Metabolomics	NA	positive	193.0623__18.82	193.062	18.82	HMDB40464	2	100000	51_12_1	193.062	18.8	Unique	193.062	0.47	Dowicide A	C12H9NaO	192.055	M+H
Metabolomics	NA	positive	291.9758__19.89	291.976	19.89	HMDB0000114		NA	NA					3	Glycerylphosphorylethanolamine	C5H14NO6P	215.056	M+2K-H
Metabolomics	NA	positive	291.9758__19.89	291.976	19.89	HMDB0059660		NA	NA					3	sn-glycero-3-Phosphoethanolamine	C5H14NO6P	215.056	M+2K-H
Metabolomics	NA	positive	331.2471__188.64	331.247	188.64	HMDB0004710		NA	NA					2	9,10,13-TriHOME	C18H34O5	330.241	M+H
Metabolomics	NA	positive	331.2471__188.64	331.247	188.64	HMDB0038555		NA	NA					2	(9S,10E,12S,13S)-9,12,13-Trihydroxy-10-octadecenoic acid	C18H34O5	330.241	M+H
Metabolomics	NA	positive	331.2471__188.64	331.247	188.64	HMDB0030936		NA	NA					2	5,8,12-Trihydroxy-9-octadecenoic acid	C18H34O5	330.241	M+H
Metabolomics	NA	positive	331.2471__188.64	331.247	188.64	HMDB0004708		NA	NA					2	9,12,13-TriHOME	C18H34O5	330.241	M+H
Metabolomics	NA	positive	363.2194__148.48	363.219	148.48	HMDB37741	0	0	51_12_37	363.219	148.5	Multiple	363.219	0.33	Bismurrayafoline E	C48H56N2O4	724.424	M+2H
Metabolomics	NA	positive	422.2499__99.88	422.25	99.88	HMDB12983	0	0	52_4_5	422.25	99.9	Multiple	422.249	3.03	Kinetensin 1-3	C15H30N6O4	358.233	M+ACN+Na
Metabolomics	NA	negative	103.0037__634.15	103.004	634.15	HMDB00691	2	100000	19_2_70	103.004	634.1	Multiple	103.004	0.19	Malonic acid	C3H4O4	104.011	M-H
Metabolomics	NA	negative	103.0037__634.15	103.004	634.15	HMDB01352	2	100000	19_2_70	103.004	634.1	Multiple	103.004	0.19	Hydroxypyruvic acid	C3H4O4	104.011	M-H
Metabolomics	NA	negative	103.0037__634.15	103.004	634.15	HMDB06938	2	100000	19_2_70	103.004	634.1	Multiple	103.004	0.19	Tartronate semialdehyde	C3H4O4	104.011	M-H
Metabolomics	NA	negative	276.9232__639.18	276.923	639.18	NA	NA	NA	NA	NA	NA	NA	NA	NA	NA	NA	NA	NA
DIABLO selected 9 Metabolomics features
Analysis	Code	polarity	mz_time	m/z	Retention time (s)
Metabolomics	met094	positive	383.8179__451.65	383.818	451.65	NA	NA	NA	NA	NA	NA	NA	NA	NA	NA	NA	NA	NA
Metabolomics	met099	positive	396.3241__455.79	396.324	455.79	HMDB39738	0	0	65_4_24	396.324	455.8	Unique	396.324	1.06	Pipereicosalidine	C25H43NO	373.334	M+Na
Metabolomics	met100	positive	396.8258__455.81	396.826	455.81	HMDB0299874								2	DG(18:1(12Z)-2OH(9,10)/0:0/i-19:0)	C40H76O7	668.559	M+3ACN+2H
Metabolomics	met100	positive	396.8258__455.81	396.826	455.81	HMDB0299873								2	DG(i-19:0/0:0/18:1(12Z)-2OH(9,10))	C40H76O7	668.559	M+3ACN+2H
Metabolomics	met100	positive	396.8258__455.81	396.826	455.81	HMDB0299872								2	DG(18:1(12Z)-2OH(9,10)/i-19:0/0:0)	C40H76O7	668.559	M+3ACN+2H
Metabolomics	met100	positive	396.8258__455.81	396.826	455.81	HMDB0299871								2	DG(i-19:0/18:1(12Z)-2OH(9,10)/0:0)	C40H76O7	668.559	M+3ACN+2H
Metabolomics	met100	positive	396.8258__455.81	396.826	455.81	HMDB0296134								2	DG(18:1(12Z)-2OH(9,10)/0:0/19:0)	C40H76O7	668.559	M+3ACN+2H
Metabolomics	met100	positive	396.8258__455.81	396.826	455.81	HMDB0296133								2	DG(19:0/0:0/18:1(12Z)-2OH(9,10))	C40H76O7	668.559	M+3ACN+2H
Metabolomics	met100	positive	396.8258__455.81	396.826	455.81	HMDB0296132								2	DG(18:1(12Z)-2OH(9,10)/19:0/0:0)	C40H76O7	668.559	M+3ACN+2H
Metabolomics	met100	positive	396.8258__455.81	396.826	455.81	HMDB0296131								2	DG(19:0/18:1(12Z)-2OH(9,10)/0:0)	C40H76O7	668.559	M+3ACN+2H
Metabolomics	met100	positive	396.8258__455.81	396.826	455.81	HMDB0115943								4	PA(i-24:0/i-17:0)	C44H87O8P	774.614	M+H+NH4
Metabolomics	met100	positive	396.8258__455.81	396.826	455.81	HMDB0115935								4	PA(i-24:0/a-17:0)	C44H87O8P	774.614	M+H+NH4
Metabolomics	met100	positive	396.8258__455.81	396.826	455.81	HMDB0115926								4	PA(i-24:0/17:0)	C44H87O8P	774.614	M+H+NH4
Metabolomics	met100	positive	396.8258__455.81	396.826	455.81	HMDB0115915								4	PA(i-22:0/i-19:0)	C44H87O8P	774.614	M+H+NH4
Metabolomics	met100	positive	396.8258__455.81	396.826	455.81	HMDB0115898								4	PA(i-22:0/19:0)	C44H87O8P	774.614	M+H+NH4
Metabolomics	met100	positive	396.8258__455.81	396.826	455.81	HMDB0115886								4	PA(i-21:0/i-20:0)	C44H87O8P	774.614	M+H+NH4
Metabolomics	met100	positive	396.8258__455.81	396.826	455.81	HMDB0115869								4	PA(i-21:0/20:0)	C44H87O8P	774.614	M+H+NH4
Metabolomics	met100	positive	396.8258__455.81	396.826	455.81	HMDB0115857								4	PA(i-20:0/i-21:0)	C44H87O8P	774.614	M+H+NH4
Metabolomics	met100	positive	396.8258__455.81	396.826	455.81	HMDB0115846								4	PA(i-20:0/a-21:0)	C44H87O8P	774.614	M+H+NH4
Metabolomics	met100	positive	396.8258__455.81	396.826	455.81	HMDB0115840								4	PA(i-20:0/21:0)	C44H87O8P	774.614	M+H+NH4
Metabolomics	met100	positive	396.8258__455.81	396.826	455.81	HMDB0115828								4	PA(i-19:0/i-22:0)	C44H87O8P	774.614	M+H+NH4
Metabolomics	met100	positive	396.8258__455.81	396.826	455.81	HMDB0115822								4	PA(i-19:0/22:0)	C44H87O8P	774.614	M+H+NH4
Metabolomics	met100	positive	396.8258__455.81	396.826	455.81	HMDB0115767								4	PA(a-25:0/i-16:0)	C44H87O8P	774.614	M+H+NH4
Metabolomics	met100	positive	396.8258__455.81	396.826	455.81	HMDB0115750								4	PA(a-25:0/16:0)	C44H87O8P	774.614	M+H+NH4
Metabolomics	met100	positive	396.8258__455.81	396.826	455.81	HMDB0115741								4	PA(a-21:0/i-20:0)	C44H87O8P	774.614	M+H+NH4
Metabolomics	met100	positive	396.8258__455.81	396.826	455.81	HMDB0115724								4	PA(a-21:0/20:0)	C44H87O8P	774.614	M+H+NH4
Metabolomics	met100	positive	396.8258__455.81	396.826	455.81	HMDB0115675								4	PA(22:0/i-19:0)	C44H87O8P	774.614	M+H+NH4
Metabolomics	met100	positive	396.8258__455.81	396.826	455.81	HMDB0115659								4	PA(21:0/i-20:0)	C44H87O8P	774.614	M+H+NH4
Metabolomics	met100	positive	396.8258__455.81	396.826	455.81	HMDB0115643								4	PA(20:0/i-21:0)	C44H87O8P	774.614	M+H+NH4
Metabolomics	met100	positive	396.8258__455.81	396.826	455.81	HMDB0115632								4	PA(20:0/a-21:0)	C44H87O8P	774.614	M+H+NH4
Metabolomics	met100	positive	396.8258__455.81	396.826	455.81	HMDB0115627								4	PA(19:0/i-22:0)	C44H87O8P	774.614	M+H+NH4
Metabolomics	met100	positive	396.8258__455.81	396.826	455.81	HMDB0115252								4	PA(22:0/19:0)	C44H87O8P	774.614	M+H+NH4
Metabolomics	met100	positive	396.8258__455.81	396.826	455.81	HMDB0115233								4	PA(21:0/20:0)	C44H87O8P	774.614	M+H+NH4
Metabolomics	met100	positive	396.8258__455.81	396.826	455.81	HMDB0115081								4	PA(20:0/21:0)	C44H87O8P	774.614	M+H+NH4
Metabolomics	met100	positive	396.8258__455.81	396.826	455.81	HMDB0115057								4	PA(19:0/22:0)	C44H87O8P	774.614	M+H+NH4
Metabolomics	met101	positive	397.3275__455.94	397.327	455.94	HMDB01276	0	0	65_4_24	397.327	455.9	Multiple	397.326	3.42	N1-Acetylspermidine	C9H21N3O	187.168	2M+Na
Metabolomics	met101	positive	397.3275__455.94	397.327	455.94	HMDB02189	0	0	65_4_24	397.327	455.9	Multiple	397.326	3.42	N8-Acetylspermidine	C9H21N3O	187.168	2M+Na
Metabolomics	met101	positive	397.3275__455.94	397.327	455.94	HMDB60288	0	0	65_4_24	397.327	455.9	Multiple	397.326	3.42	N(8)-Acetylspermidinium	C9H21N3O	187.168	2M+Na
Metabolomics	met102	positive	404.3215__443.89	404.322	443.89	HMDB0240633								1	SM(d18:2(4E,14Z)/22:0)	C45H89N2O6P	784.646	M+H+Na
Metabolomics	met102	positive	404.3215__443.89	404.322	443.89	HMDB0011694								1	SM(d16:1/24:1(15Z))	C45H89N2O6P	784.646	M+H+Na
Metabolomics	met102	positive	404.3215__443.89	404.322	443.89	HMDB0012104								1	SM(d18:1/22:1(13Z))	C45H89N2O6P	784.646	M+H+Na
Metabolomics	met103	positive	405.3294__455.72	405.329	455.72	HMDB0259122								1	Tresperimus	C17H37N7O3	387.296	M+NH4
Metabolomics	met103	positive	405.3294__455.72	405.329	455.72	HMDB0243514								1	Deoxyspergualin	C17H37N7O3	387.296	M+NH4
Metabolomics	met103	positive	405.3294__455.72	405.329	455.72	HMDB0012103								1	SM(d18:1/22:0)	C45H91N2O6P	786.661	M+H+Na
Metabolomics	met103	positive	405.3294__455.72	405.329	455.72	HMDB0012092								1	SM(d18:0/22:1(13Z))	C45H91N2O6P	786.661	M+H+Na
Metabolomics	met103	positive	405.3294__455.72	405.329	455.72	HMDB0298181								2	DG(TXB2/0:0/a-25:0)	C48H88O9	808.643	M+2H
Metabolomics	met103	positive	405.3294__455.72	405.329	455.72	HMDB0298180								2	DG(a-25:0/0:0/TXB2)	C48H88O9	808.643	M+2H
Metabolomics	met103	positive	405.3294__455.72	405.329	455.72	HMDB0298179								2	DG(TXB2/a-25:0/0:0)	C48H88O9	808.643	M+2H
Metabolomics	met103	positive	405.3294__455.72	405.329	455.72	HMDB0298178								2	DG(a-25:0/TXB2/0:0)	C48H88O9	808.643	M+2H
Metabolomics	met103	positive	405.3294__455.72	405.329	455.72	HMDB0298161								2	DG(6 keto-PGF1alpha/0:0/a-25:0)	C48H88O9	808.643	M+2H
Metabolomics	met103	positive	405.3294__455.72	405.329	455.72	HMDB0298160								2	DG(a-25:0/0:0/6 keto-PGF1alpha)	C48H88O9	808.643	M+2H
Metabolomics	met103	positive	405.3294__455.72	405.329	455.72	HMDB0298159								2	DG(6 keto-PGF1alpha/a-25:0/0:0)	C48H88O9	808.643	M+2H
Metabolomics	met103	positive	405.3294__455.72	405.329	455.72	HMDB0298158								2	DG(a-25:0/6 keto-PGF1alpha/0:0)	C48H88O9	808.643	M+2H
Metabolomics	met103	positive	405.3294__455.72	405.329	455.72	HMDB0258339								2	[(2S,3R)-3-Hydroxy-2-[[(5E,8E,11E,14E)-tetracosa-5,8,11,14-tetraenoyl]amino]octadecyl] 2-(trimethylazaniumyl)ethyl phosphate	C47H89N2O6P	808.646	M+2H
Metabolomics	met103	positive	405.3294__455.72	405.329	455.72	HMDB0240644								2	SM(d18:2(4E,14Z)/24:2(5Z,9Z))	C47H89N2O6P	808.646	M+2H
Metabolomics	met103	positive	405.3294__455.72	405.329	455.72	HMDB0250184								3	Cholesteryl chloride	C27H45Cl	404.321	M+H
Metabolomics	met103	positive	405.3294__455.72	405.329	455.72	HMDB0241938								3	N-Stearoyl Asparagine	C22H42N2O4	398.314	M+Li
Metabolomics	met104	positive	405.831__455.73	405.831	455.73	HMDB04972	0	0	65_4_24	405.831	455.7	Multiple	405.832	2.32	Glucosylceramide (d18:118:0)	C42H81NO8	727.596	M+2ACN+2H
Metabolomics	met104	positive	405.831__455.73	405.831	455.73	HMDB10709	0	0	65_4_24	405.831	455.7	Multiple	405.832	2.32	Galactosylceramide (d18:118:0)	C42H81NO8	727.596	M+2ACN+2H
Metabolomics	met109	positive	418.3371__460.1	418.337	460.1	HMDB0240635								1	SM(d18:2(4E,14Z)/24:0)	C47H93N2O6P	812.677	M+H+Na
Metabolomics	met109	positive	418.3371__460.1	418.337	460.1	HMDB0012107								1	SM(d18:1/24:1(15Z))	C47H93N2O6P	812.677	M+H+Na
Metabolomics	met110	positive	419.3448__473.98	419.345	473.98	HMDB0011697								0	SM(d18:1/24:0)	C47H95N2O6P	814.693	M+H+Na
Metabolomics	met110	positive	419.3448__473.98	419.345	473.98	HMDB0012095								0	SM(d18:0/24:1(15Z))	C47H95N2O6P	814.693	M+H+Na
Metabolomics	met110	positive	419.3448__473.98	419.345	473.98	HMDB0248445								1	Anisperimus	C18H39N7O3	401.311	M+NH4
Metabolomics	met110	positive	419.3448__473.98	419.345	473.98	HMDB0241941								3	N-Stearoyl Glutamine	C23H44N2O4	412.33	M+Li
